# Supplementary material for: Accuracy of taxonomy prediction for 16S rRNA and fungal ITS sequences
Source: PeerJ journal article supplement (doi:10.7717/peerj.4652), 2018-04-18
Supplement: figS1.pdf [file figS1.pdf]

(A) Distance matrix

|   | a | b | c | d | e |
|---|---|---|---|---|---|
| a | S | F | G | G | F |
| b | F | S | G | F | S |
| c | G | G | S | G | G |
| d | G | F | G | S | F |
| e | F | S | G | F | S |

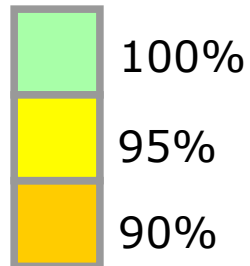

|   |             |
|---|-------------|
| S | LCR=Species |
| G | LCR=Genus   |
| F | LCR=Family  |

(B) 11 pairs at 100%

|   |   |   |   |   |
|---|---|---|---|---|
| S | F | G | G | F |
| F | S | G | F | S |
| G | G | S | G | G |
| G | F | G | S | F |
| F | S | G | F | S |

$$P(S) = 5/11$$
$$P(G) = 4/11$$
$$P(F) = 2/11$$

(C) 6 pairs at 95%

|   |   |   |   |   |
|---|---|---|---|---|
| S | F | G | G | F |
| F | S | G | F | S |
| G | G | S | G | G |
| G | F | G | S | F |
| F | S | G | F | S |

$$P(S) = 2/6$$
$$P(G) = 4/6$$
$$P(F) = 0/6$$

(D) 8 pairs at 90%

|   |   |   |   |   |
|---|---|---|---|---|
| S | F | G | G | F |
| F | S | G | F | S |
| G | G | S | G | G |
| G | F | G | S | F |
| F | S | G | F | S |

$$P(S) = 0/8$$
$$P(G) = 2/8$$
$$P(F) = 6/8$$
