# Supplementary material for: Accuracy of taxonomy prediction for 16S rRNA and fungal ITS sequences
Source: PeerJ journal article supplement (doi:10.7717/peerj.4652), 2018-04-18

(a) Human gut vs. GG97

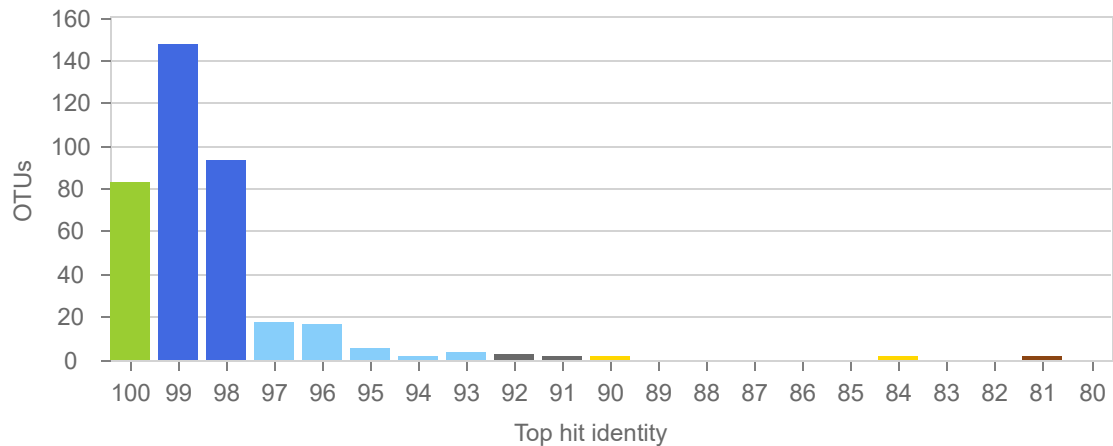

(b) Microbial mat vs. GG97

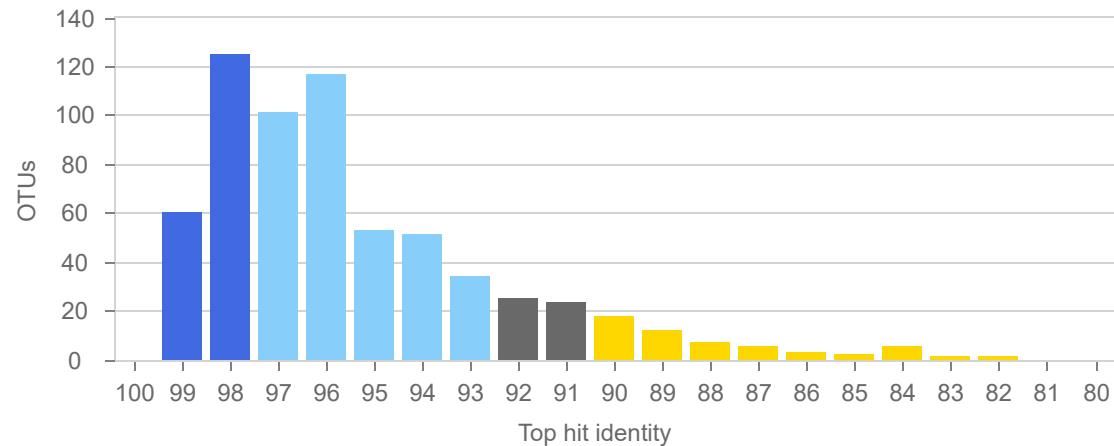

(c) Soil vs. GG97

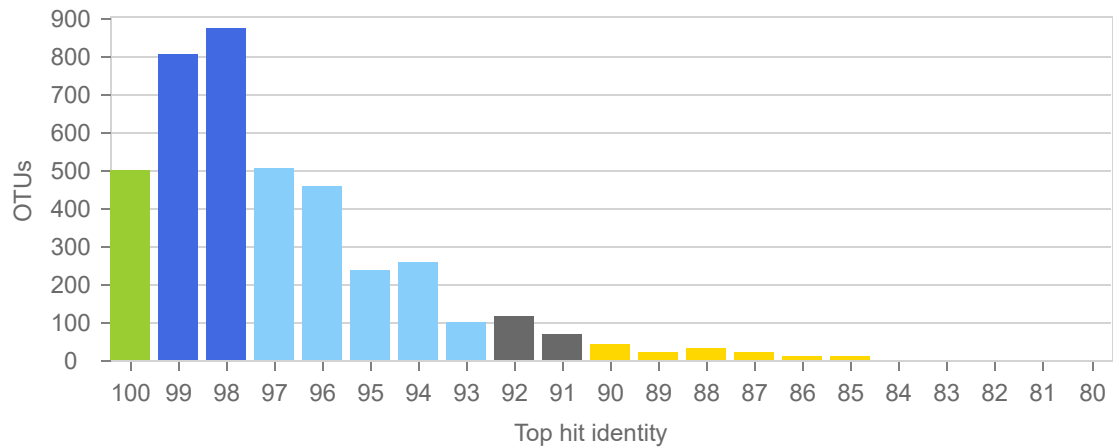

(d) Soil vs. UNITE

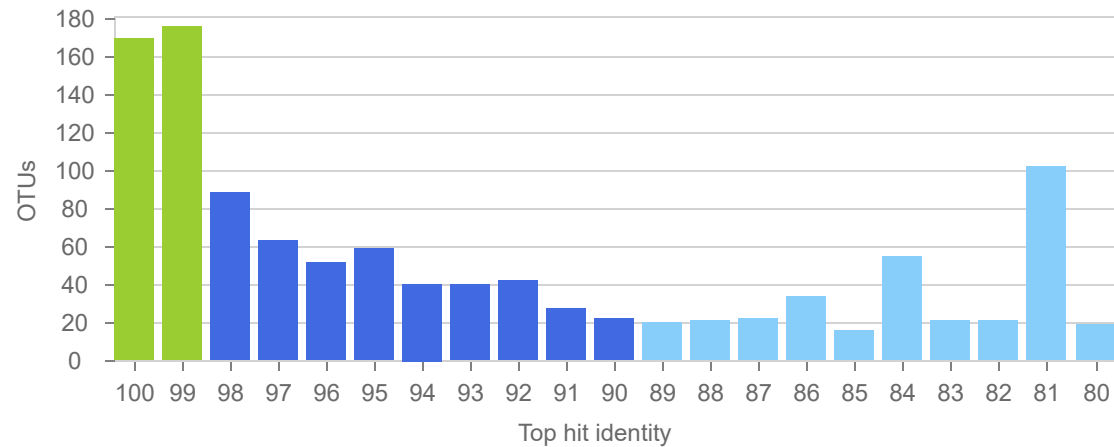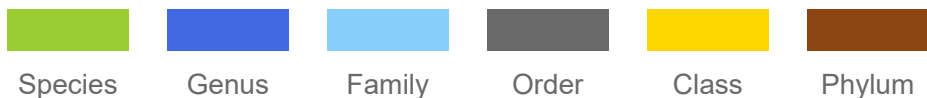

Supplement: figS2.pdf [file figS2.pdf]
