# Supplementary material for: Accuracy of taxonomy prediction for 16S rRNA and fungal ITS sequences
Source: PeerJ journal article supplement (doi:10.7717/peerj.4652), 2018-04-18
Supplement: figS3.pdf [file figS3.pdf]

# Bokulich F

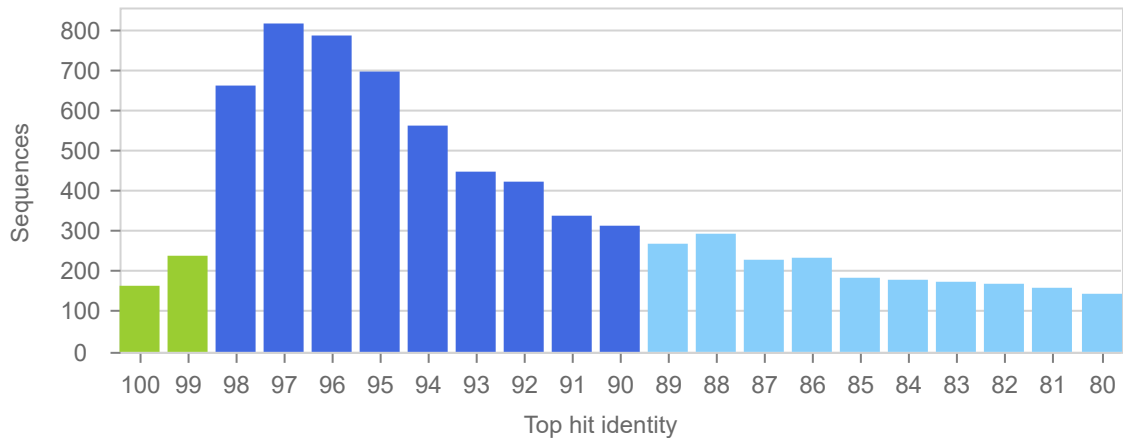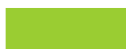

Species

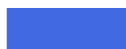

Genus

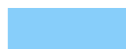

Family
